# Supplementary material for: Ciliary Hedgehog signaling regulates cell survival to build the facial midline
Source: eLife journal article supplement (doi:10.7554/elife.68558), 2021-10-21
Supplement: supp [file elife-68558-supp-v1.zip]

## Supplementary File 1: Primer sets used for genotyping and RT-qPCR

### Primers for genotyping

| Gene                 | Forward Primer                  | Reverse Primer                   |
|----------------------|---------------------------------|----------------------------------|
| <i>Cc2d2a</i>        | TGTCCTGGAGCTCCCTTCTA            | TGCAGGCAATTTCTCTGTTG (wt)        |
|                      |                                 | CTTCACATCCATGCTGAGGA (mut)       |
| <i>Cre</i> (generic) | ACATTTGGGCCAGCTAAACAT           | CGGCATCAACGTTTTCTTTT             |
| <i>Islet1:cre</i>    | CATTTCACTGTGGACATTACTCCC        | ATCTTCAGGTTCTGCGGGAA             |
| <i>mTmG</i>          | CTCTGCTGCCTCCTGGCTTCT           | CGAGGCGGATCACAAGCAATA (wt)       |
|                      |                                 | TCAATGGGCGGGGGTCGTT (gt)         |
| <i>Ptch1</i>         | GCCTGAAGAACGAGATCAGC (mut)      | GTTTCCCAGCTTCCCTTTTC (mut)       |
|                      | AGGGCTTCTCGTTGGCTACAA (wt)      | CTGCGGCAAGTTTTTGGTTG (wt)        |
| <i>R26-EYFP</i>      | AAAGTCGCTCTGAGTTGTTAT           | TAAGCCTGCCCAGAAGACTC (wt)        |
|                      |                                 | GAAAGACCGCGAAGAGTTTG (mut)       |
| <i>Sox1:cre</i>      | GGCCCTCTCTTTGCGGTA              | GGCAAACGGACAGAAGCATT             |
| <i>Tctn2</i>         | AGTGTGTCCTACTTAGGGCTTTTG (wt)   | TCCTTCAGTGGTGAACCTCAAC (wt)      |
|                      | CAGCAAGAACCATGTCTGGA (mut/cond) | CTTCAGTGGTGAACCTCAACG (mut)      |
|                      |                                 | ACGGGTGTCCTACATCCAAG (cond)      |
| <i>Tmem231</i>       | TCTAGGGAAACCTGGAGAAAC           | GCATGCAAGGACTTAACCACT (wt)       |
|                      |                                 | AGCTAGCTTGCCAAACCTACA (mut)      |
| <i>Tmem67</i>        | GGGTGGGATTAGATAAATGCCTGCTCT     | GGCTATGGGTAGAATATTGTTCCAG (wt)   |
|                      |                                 | GGACCTGGCGATTTGACGTCCTCA G (mut) |

**wt = wild-type allele**

**mut = mutant/null allele**

**cond = conditional allele**

**gt = gene trap**

### Primer sets used for RT-qPCR

| Gene         | Forward Primer          | Reverse Primer                |
|--------------|-------------------------|-------------------------------|
| <i>Actb</i>  | TTCTTTGCAGCTCCTTCGTT    | ATGGAGGGGAATACAGCCC           |
| <i>Gli1</i>  | GGTGTGCCTATAGCCAGTGCCTC | GTGCCAATCCGGTGGAGTCAGACC<br>C |
| <i>Hprt</i>  | TCCTCCTCAGACCGCTTTT     | CATAACCTGGTTCATCATCGC         |
| <i>Ptch1</i> | CTCCTCATATTTGGGGCCTT    | AATTCTCGACTCACTCGTCCA         |
| <i>Shh</i>   | CCAATTACAACCCCGACATC    | GGCCAAGGCATTTAACTTGT          |
| <i>Ubc</i>   | TCCAGAAAGAGTCCACCCTG    | GACGTCCAAGGTGATGGTCT          |
