# Supplementary material for: Ciliary Hedgehog signaling regulates cell survival to build the facial midline
Source: eLife journal article supplement (doi:10.7554/elife.68558), 2021-10-21

Figure 4 - Figure Supplement 1. Deletion of *Tctn2* in the prechordal plate by *Isl1*<sup>Cre</sup>, neurectoderm by *Sox1*<sup>Cre</sup>, facial ectoderm by *Tcfap2a*<sup>Cre</sup>, or forebrain and facial ectoderm by *Foxg1*<sup>Cre</sup> does not result in hypotelorism

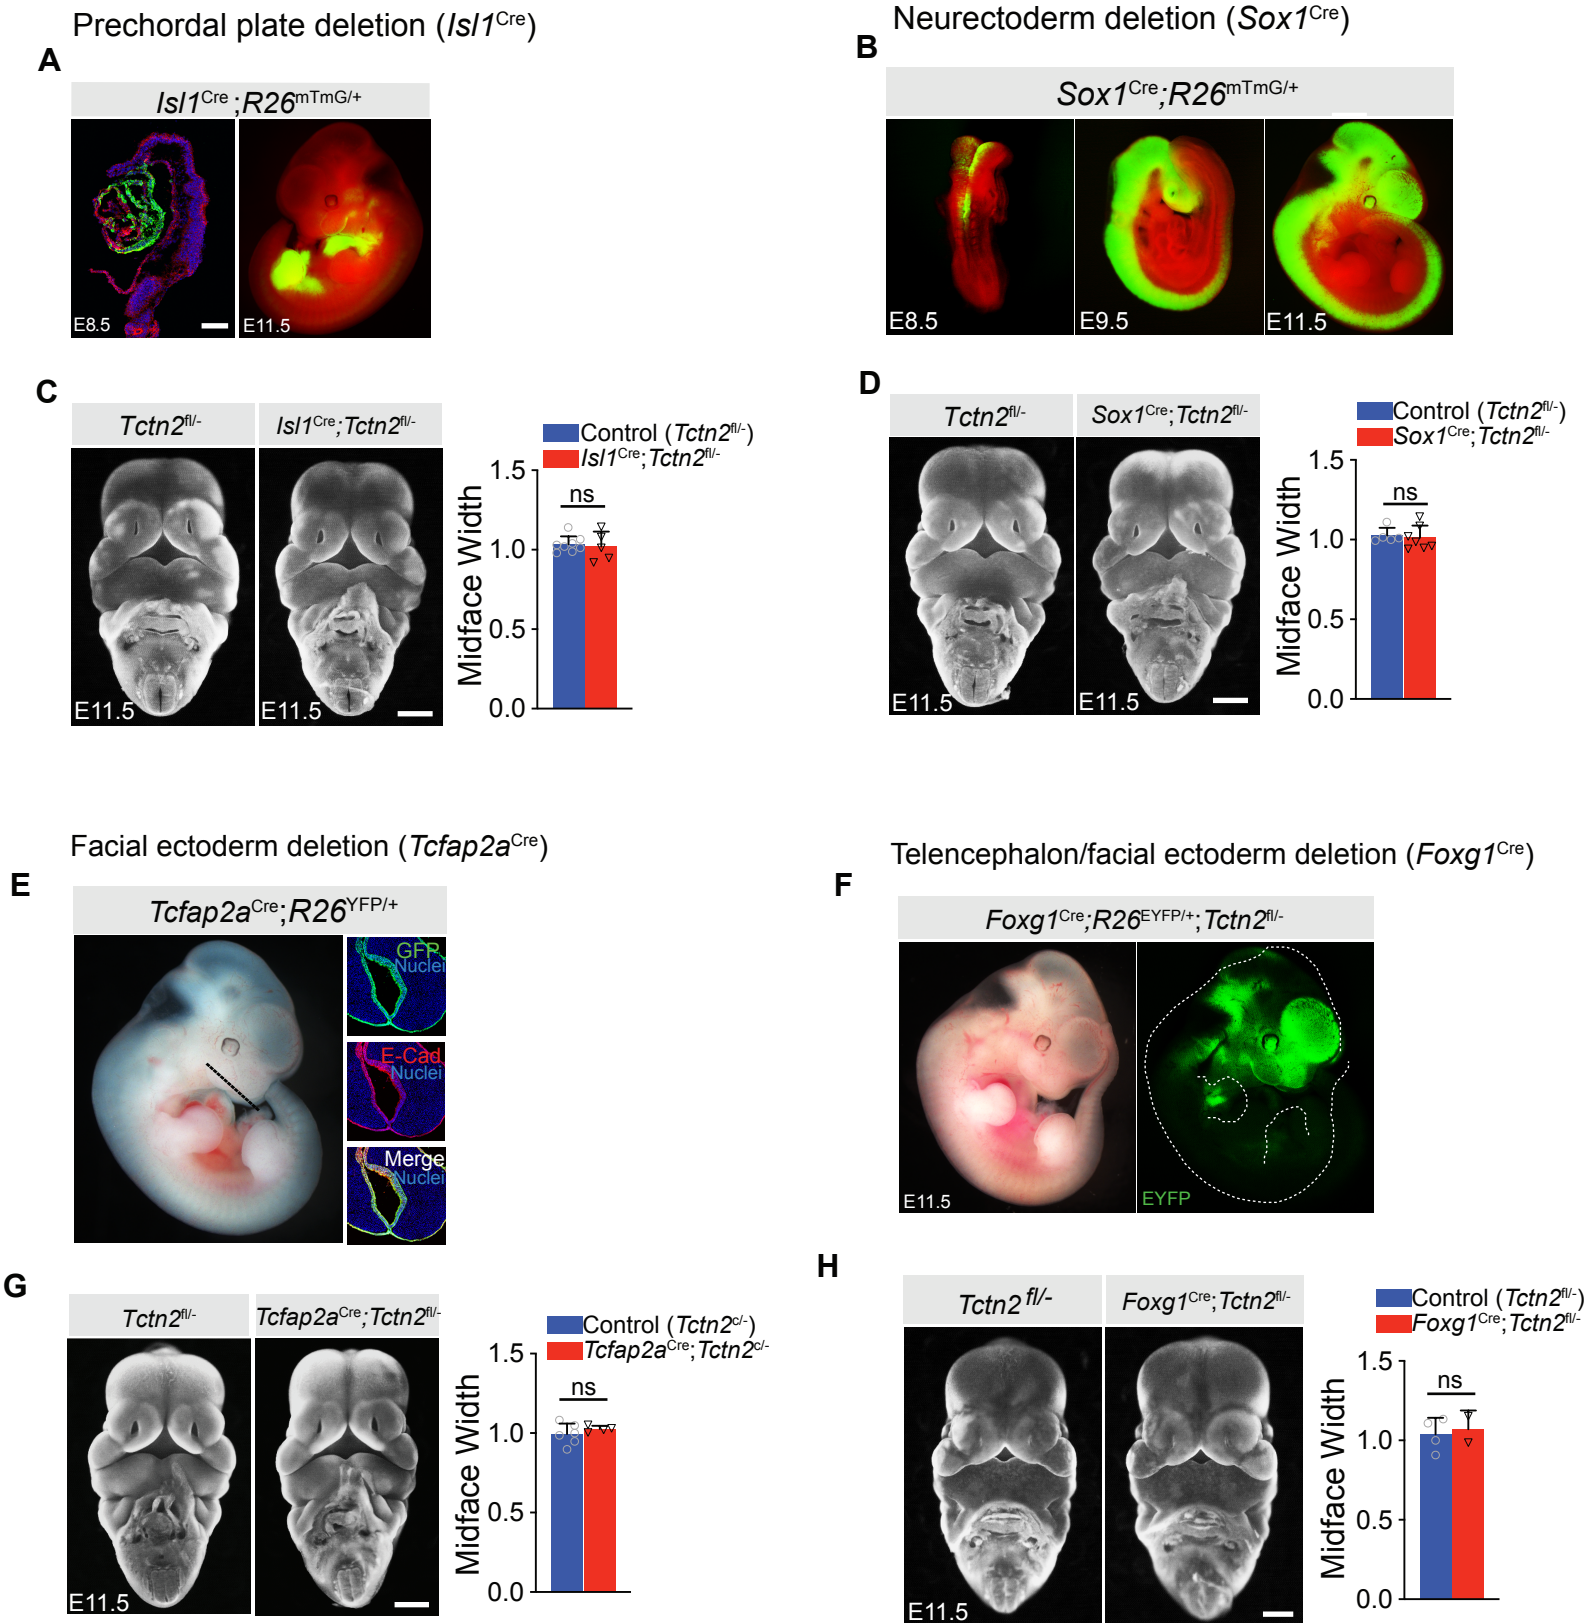

Supplement: supp [file elife-68558-supp-v1.zip]
