# Supplementary material for: Ciliary Hedgehog signaling regulates cell survival to build the facial midline
Source: eLife journal article supplement (doi:10.7554/elife.68558), 2021-10-21

Figure 4- Figure Supplement 2. Residual TCTN2 function through persistent ARL13B ciliary localization in TCTN2 conditional mutants

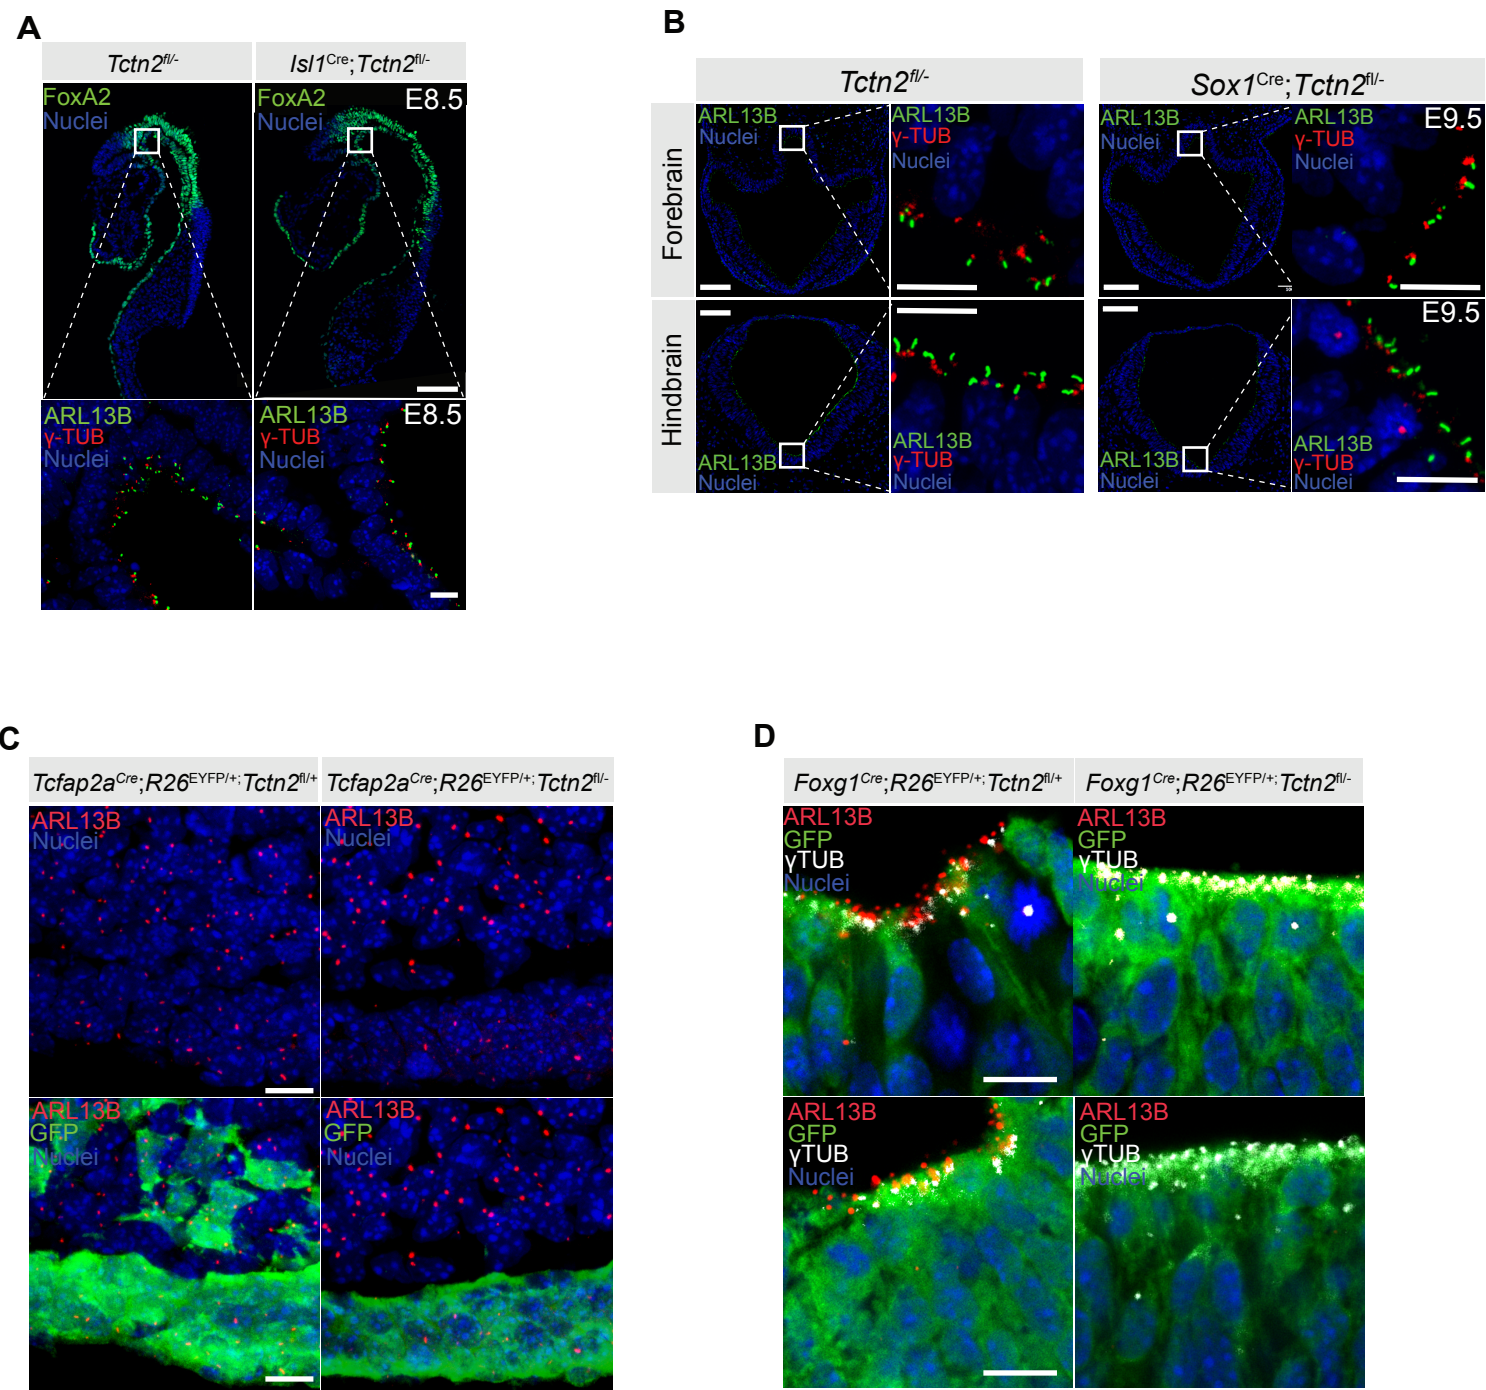

Supplement: supp [file elife-68558-supp-v1.zip]
