# Supplementary material for: Ciliary Hedgehog signaling regulates cell survival to build the facial midline
Source: eLife journal article supplement (doi:10.7554/elife.68558), 2021-10-21
Supplement: supp [file elife_poa_e68558_Figure_1_figure_supplement_1_source_data_1.xlsx]

## Sheet: Sheet1
Tctn2 E10_5 midface values compiled
Litter	Tctn WT values		litter	Tctn2 Het values		litter	Tctn2 null values
t2_03673_06	1		t2_03673_06	0.989091		t2_03673_06	0.585441
t2_04180_04	1.02705		t2_03673_06	1.00367		t2_04180_04	0.547742
t2_04180_04	0.972948		t2_03673_06	1.02195		t2_F193	0.632676
t2_F193	1.00277		t2_03673_06	1.04367		t2_F193	0.569817
t2_F193	1.01011		t2_04180_04	1.00177
t2_F193	1.04354		t2_F193	1.0545
t2_F193	0.943418		t2_F193	0.969459
Tctn2 E11_5 midface values compiled
litter	Tctn WT values		litter	Tctn2 Het values		litter	Tctn2 null values
SRA060	1		SRA060	0.9043		SRA060	0.649
t2_01470_01	1.02982		t2_01470_01	0.98729		t2_F038	0.432719
t2_01470_01	0.901991		t2_01470_01	0.880653		t2_F038	0.47513
t2_01470_01	1.20024		t2_F038	1.05204		SRA080	0.78327
t2_F038	1.04345		t2_F038	0.967215		SRA080	0.501267
t2_F038	0.984069		t2_F038	1.00952		SRA080	0.422687
t2_F038	0.975588		t2_F038	0.950139		SRA080	0.777567
t2_F038	1.01801		SRA080	1.07034
SRA080	1.03676		SRA080	1.03676
SRA080	0.963245		SRA080	0.923954
			SRA080	1.00824
Cc2d2a E10_5 midface values compiled
Litter	Cc2d2a WT		litter	Cc2d2a het			Cc2d2a null
SRA103	1.06735		SRA103	1.05518		SRA103	0.698085
SRA103	1.0917		SRA103	1.0553		SRA103	0.917224
SRA103	1.00648		SRA103	0.98619		SRA103	0.811681
SRA103	0.91727		SRA103	0.905049		SRA103	0.755028
SRA103	0.917197		SRA103	0.969982		SRA103	0.612811
mks6_01610-03	0.922073		mks6_01610-03	0.805102		mks6_01610-03	0.755105
mks6_01610-03	1.00553		mks6_01610-03	0.962158
mks6_01610-03	1.07239		mks6_01610-03	1.08571
Cc2d2a E11_5 midface values compiled
litter	Cc2d2a WT		litter	Cc2d2a het		litter	Cc2d2a null
SRA089	1.10677		SRA089	0.938377		SRA089	0.406955
SRA089	0.900549		SRA089	1.05796		SRA089	0.748627
SRA089	0.992678		SRA089	0.970714		SRA089	0.325198
mks6_01610_01	1.00236		SRA089	1.06284		SRA089	0.661379
mks6_01610_01	0.987966		SRA089	1.08481		SRA089	0.634533
mks6_01610_01	1.00967		mks6_01610_01	0.995714		mks6_01610_01	0.387841
			mks6_01610_01	1.07575		mks6_01610_01	0.424354
			mks6_01610_01	1.0097
			mks6_01610_01	0.97309
Tmem231 E10_5 midface values compiled
litter	Tmem231WT			Tmem231 Het			Tmem231 null
t231_01930-01	1.0243		t231_F060	0.997204		t231_F060	0.903587
t231_01930-01	0.951436		t231_F060	0.961206		t231_F060	0.84965
t231_01930-01	1.02426		t231_F060	1.02278		t231_F060	0.713011
			t231_F060	1.04312		t231_01930-01	0.887693
			t231_01930-01	0.975686		t231_01930-01	0.464356
			t231_01930-01	0.983301		t231_01930-01	0.578158
			t231_01930-01	0.933317
			t231_01930-01	0.987886
Tmem231 E11_5 midface values compiled
litter	Tmem 231 WT		litter	Tmem231 Het		litter	Tmem231 Null
t231_F042	0.959589		t231_F042	1.13712		t231_F042	0.683573
t231_F042	1.03222		t231_F042	0.979504		t231_F052	0.903079
t231_F042	1.00819		t231_F042	1.01893
t231_F052	1		t231_F042	1.05179
			t231_F042	0.920366
			t231_F052	1
			t231_F052	0.955197
			t231_F052	0.977585
			t231_F052	1
			t231_F052	0.903079
			t231_F052	1.01492
Tmem67 E11_5 midface values compiled
litter	Tmem67 WT		litter	Tmem67 Het		litter	Tmem67 Null
t67_02670_01	1		t67_02670_01	0.938754		t67_02670_01	1.02758
t67_02670_03	1		t67_02670_01	0.965426		t67_02670_03	1.03545
t67_02240_04	1.00001		t67_02670_01	0.951731		t67_02670_03	0.986352
t67_02240_04	0.999986		t67_02670_01	0.868882		t67_02240_04	1.02972
			t67_02670_01	1.00682
			t67_02670_03	0.978853
			t67_02670_03	1.04963
			t67_02670_03	0.978625
			t67_02240_04	0.970359
			t67_02240_04	1.1186
			t67_02240_04	0.970359
			t67_02240_04	0.940759
