# Supplementary material for: Ciliary Hedgehog signaling regulates cell survival to build the facial midline
Source: eLife journal article supplement (doi:10.7554/elife.68558), 2021-10-21
Supplement: supp [file elife_poa_e68558_Figure_3_source_data_1.xlsx]

## Sheet: E8_5 raw qPCR
Sample Name	Detector Name	Ct	Actin	SD				Actin	SD	Ubc	SD	Hprt	SD	Gli1	SD	Ptch1	SD	Shh-1	SD	Shh-2	SD	Six3-1	SD	Six3-2	SD	Six3-3	SD	XIAP-1	SD	XIAP-2	SD
311-1	actin	20.7279	20.8327	0.153748			311-1	20.8327	0.153748	20.4366	0.199638	26.567	0.0538689	30.5713	0.125735	27.7423	0.135141	31.3039	0.336826	30.3757	0.276719	28.9271	0.232866	29.2535	0.168272	30.3186	0.0655638	28.8013	0.118884	26.6987	0.124659
311-1	actin	20.7189					311-2	20.6736	0.185607	20.174	0.141784	26.5702	0.143807	30.5258	0.122157	27.6672	0.0826126	31.2941	0.310644	30.4094	0.421559	28.2751	0.192745	28.8987	0.0470149	29.8593	0.0716995	28.661	0.129314	26.6347	0.191244
311-1	actin	21.0495					311-3	19.9629	0.193363	19.9499	0.0220705	26.1994	0.0786358	29.5594	0.455675	27.1874	0.19506	30.8529	0.181737	29.8238	0.150759	27.9731	0.0786649	28.2274	0.12306	29.4428	0.17948	28.4681	0.133273	26.217	0.248624
311-1	actin	20.8346					311-4	19.9312	0.0470708	19.8877	0.0340064	26.2692	0.198149	30.0245	0.202736	27.2374	0.094924	30.6485	0.163515	29.7489	0.198403	28.2391	0.0969979	28.5657	0.244597	29.6833	0.160213	28.3413	0.0587614	26.0152	0.316704
311-10	actin	19.9277	19.9968	0.064088			311-7	21.8089	0.0569776	20.7239	0.0976554	26.8957	0.265915	32.0128	0.482881	28.9231	0.0714546	33.6121	0.674694	32.5209	0.873481	28.93	0.0878094	29.4426	0.185726	30.6214	0.276218	29.5766	0.0748534	27.194	0.798835
311-10	actin	19.9573					311-8	20.0429	0.0706905	20.049	0.0205215	26.7766	0.1323	30.5605	0.301037	27.6933	0.0948579	31.4587	0.431109	30.4689	0.481513	27.6822	0.176178	27.9722	0.0903596	29.1228	0.103871	28.5173	0.0719846	26.4948	0.221368
311-10	actin	20.0443					311-9	20.1514	0.0550756	19.9414	0.0133559	26.2686	0.101459	30.5818	0.251046	27.7018	0.055571	31.5842	0.411992	30.9331	0.259443	27.8182	0.0763091	28.1201	0.0533958	29.0913	0.225553	28.4406	0.080761	26.3136	0.0754429
311-10	actin	20.0579					311-10	19.9968	0.064088	19.8458	0.0614735	25.9655	0.0256178	30.5708	0.177699	27.7638	0.151959	31.3058	0.0909397	30.5647	0.259876	27.6425	0.108597	28.0078	0.0930413	29.0885	0.208486	28.621	0.164395	26.3001	0.133635
311-2	actin	20.9503	20.6736	0.185607
311-2	actin	20.5574
311-2	actin	20.6073
311-2	actin	20.5794						Actin	SD	Ubc	SD	Hprt	SD	Gli1	SD	Ptch1	SD	Shh-1	SD	Shh-2	SD	Six3-1	SD	Six3-2	SD	Six3-3	SD	XIAP-1	SD	XIAP-2	SD
311-3	actin	19.8439	19.9629	0.193363			311-1	20.8327	0.153748	20.4366	0.199638	26.567	0.0538689	30.5713	0.125735	27.7423	0.135141	31.3039	0.336826	30.3757	0.276719	28.9271	0.232866	29.2535	0.168272	30.3186	0.0655638	28.8013	0.118884	26.6987	0.124659
311-3	actin	19.8448					311-10	19.9968	0.064088	19.8458	0.0614735	25.9655	0.0256178	30.5708	0.177699	27.7638	0.151959	31.3058	0.0909397	30.5647	0.259876	27.6425	0.108597	28.0078	0.0930413	29.0885	0.208486	28.621	0.164395	26.3001	0.133635
311-3	actin	20.2487					311-2	20.6736	0.185607	20.174	0.141784	26.5702	0.143807	30.5258	0.122157	27.6672	0.0826126	31.2941	0.310644	30.4094	0.421559	28.2751	0.192745	28.8987	0.0470149	29.8593	0.0716995	28.661	0.129314	26.6347	0.191244
311-3	actin	19.9143					311-3	19.9629	0.193363	19.9499	0.0220705	26.1994	0.0786358	29.5594	0.455675	27.1874	0.19506	30.8529	0.181737	29.8238	0.150759	27.9731	0.0786649	28.2274	0.12306	29.4428	0.17948	28.4681	0.133273	26.217	0.248624
311-4	actin	19.8642	19.9312	0.0470708			311-4	19.9312	0.0470708	19.8877	0.0340064	26.2692	0.198149	30.0245	0.202736	27.2374	0.094924	30.6485	0.163515	29.7489	0.198403	28.2391	0.0969979	28.5657	0.244597	29.6833	0.160213	28.3413	0.0587614	26.0152	0.316704
311-4	actin	19.9464					311-7	21.8089	0.0569776	20.7239	0.0976554	26.8957	0.265915	32.0128	0.482881	28.9231	0.0714546	33.6121	0.674694	32.5209	0.873481	28.93	0.0878094	29.4426	0.185726	30.6214	0.276218	29.5766	0.0748534	27.194	0.798835
311-4	actin	19.9742					311-8	20.0429	0.0706905	20.049	0.0205215	26.7766	0.1323	30.5605	0.301037	27.6933	0.0948579	31.4587	0.431109	30.4689	0.481513	27.6822	0.176178	27.9722	0.0903596	29.1228	0.103871	28.5173	0.0719846	26.4948	0.221368
311-4	actin	19.9401					311-9	20.1514	0.0550756	19.9414	0.0133559	26.2686	0.101459	30.5818	0.251046	27.7018	0.055571	31.5842	0.411992	30.9331	0.259443	27.8182	0.0763091	28.1201	0.0533958	29.0913	0.225553	28.4406	0.080761	26.3136	0.0754429
311-7	actin	21.7438	21.8089	0.0569776
311-7	actin	21.8633
311-7	actin	21.8495
311-7	actin	21.779
311-8	actin	20.148	20.0429	0.0706905
311-8	actin	20.0017
311-8	actin	20.0013
311-8	actin	20.0204
311-9	actin	20.8283	20.1514	0.0550756
311-9	actin	20.2061
311-9	actin	20.1523
311-9	actin	20.0959
Sample Name	Detector Name	Ct	Gli1	SD
311-1	Gli1	30.5296	30.5713	0.125735
311-1	Gli1	30.7438
311-1	Gli1	30.5665
311-1	Gli1	30.4452
311-10	Gli1	30.3284	30.5708	0.177699
311-10	Gli1	30.715
311-10	Gli1	30.692
311-10	Gli1	30.5479
311-2	Gli1	30.6062	30.5258	0.122157
311-2	Gli1	30.5053
311-2	Gli1	30.3615
311-2	Gli1	30.6301
311-3	Gli1	29.4888	29.5594	0.455675
311-3	Gli1	29.9493
311-3	Gli1	28.9443
311-3	Gli1	29.8553
311-4	Gli1	30.0509	30.0245	0.202736
311-4	Gli1	29.9826
311-4	Gli1	30.278
311-4	Gli1	29.7866
311-7	Gli1	32.283	32.0128	0.482881
311-7	Gli1	31.3722
311-7	Gli1	32.4695
311-7	Gli1	31.9263
311-8	Gli1	30.3166	30.5605	0.301037
311-8	Gli1	30.9336
311-8	Gli1	30.676
311-8	Gli1	30.3158
311-9	Gli1	30.5309	30.5818	0.251046
311-9	Gli1	30.4788
311-9	Gli1	30.3723
311-9	Gli1	30.9451
Sample Name	Detector Name	Ct	hprt	SD
311-1	hprt	26.5154	26.567	0.0538689
311-1	hprt	26.5793
311-1	hprt	26.6373
311-1	hprt	26.536
311-10	hprt	25.9455	25.9655	0.0256178
311-10	hprt	26.0012
311-10	hprt	25.9669
311-10	hprt	25.9485
311-2	hprt	26.3917	26.5702	0.143807
311-2	hprt	26.6533
311-2	hprt	26.7146
311-2	hprt	26.5211
311-3	hprt	26.1718	26.1994	0.0786358
311-3	hprt	26.2196
311-3	hprt	26.2962
311-3	hprt	26.1099
311-4	hprt	26.1565	26.2692	0.198149
311-4	hprt	26.0489
311-4	hprt	26.4601
311-4	hprt	26.4111
311-7	hprt	26.7752	26.8957	0.265915
311-7	hprt	27.0341
311-7	hprt	27.1853
311-7	hprt	26.5882
311-8	hprt	26.7116	26.7766	0.1323
311-8	hprt	26.729
311-8	hprt	26.9738
311-8	hprt	26.6921
311-9	hprt	26.2859	26.2686	0.101459
311-9	hprt	26.3238
311-9	hprt	26.3438
311-9	hprt	26.1207
Sample Name	Detector Name	Ct	Ptch1	SD
311-1	Ptch1	27.9106	27.7423	0.135141
311-1	Ptch1	27.6474
311-1	Ptch1	27.6197
311-1	Ptch1	27.7916
311-10	Ptch1	27.9343	27.7638	0.151959
311-10	Ptch1	27.7883
311-10	Ptch1	27.5648
311-10	Ptch1	27.7678
311-2	Ptch1	27.5878	27.6672	0.0826126
311-2	Ptch1	27.7828
311-2	Ptch1	27.64
311-2	Ptch1	27.6584
311-3	Ptch1	27.0659	27.1874	0.19506
311-3	Ptch1	27.3378
311-3	Ptch1	26.9775
311-3	Ptch1	27.3682
311-4	Ptch1	27.1946	27.2374	0.094924
311-4	Ptch1	27.1628
311-4	Ptch1	27.2162
311-4	Ptch1	27.3759
311-7	Ptch1	28.845	28.9231	0.0714546
311-7	Ptch1	28.9274
311-7	Ptch1	28.9031
311-7	Ptch1	29.0169
311-8	Ptch1	27.6799	27.6933	0.0948579
311-8	Ptch1	27.7878
311-8	Ptch1	27.7381
311-8	Ptch1	27.5673
311-9	Ptch1	27.6354	27.7018	0.055571
311-9	Ptch1	27.6929
311-9	Ptch1	27.7083
311-9	Ptch1	27.7706
Sample Name	Detector Name	Ct	Shh-1	SD
311-1	Shh-1	30.9722	31.3039	0.336826
311-1	Shh-1	31.7715
311-1	Shh-1	31.201
311-1	Shh-1	31.271
311-10	Shh-1	31.383	31.3058	0.0909397
311-10	Shh-1	31.3781
311-10	Shh-1	31.2662
311-10	Shh-1	31.1959
311-2	Shh-1	31.5538	31.2941	0.310644
311-2	Shh-1	31.2741
311-2	Shh-1	30.8637
311-2	Shh-1	31.4849
311-3	Shh-1	30.599	30.8529	0.181737
311-3	Shh-1	30.9994
311-3	Shh-1	30.846
311-3	Shh-1	30.9674
311-4	Shh-1	30.5036	30.6485	0.163515
311-4	Shh-1	30.5212
311-4	Shh-1	30.8392
311-4	Shh-1	30.7301
311-7	Shh-1	33.9519	33.6121	0.674694
311-7	Shh-1	33.8892
311-7	Shh-1	32.6026
311-7	Shh-1	34.0049
311-8	Shh-1	31.3669	31.4587	0.431109
311-8	Shh-1	31.1286
311-8	Shh-1	31.2507
311-8	Shh-1	32.0887
311-9	Shh-1	31.7583	31.5842	0.411992
311-9	Shh-1	31.9627
311-9	Shh-1	31.0055
311-9	Shh-1	31.6103
Sample Name	Detector Name	Ct	Shh-2	SD
311-1	Shh-2	30.3443	30.3757	0.276719
311-1	Shh-2	30.473
311-1	Shh-2	30.6721
311-1	Shh-2	30.0132
311-10	Shh-2	30.4404	30.5647	0.259876
311-10	Shh-2	30.3608
311-10	Shh-2	30.5146
311-10	Shh-2	30.943
311-2	Shh-2	30.5015	30.4094	0.421559
311-2	Shh-2	30.2562
311-2	Shh-2	29.9404
311-2	Shh-2	30.9397
311-3	Shh-2	29.9418	29.8238	0.150759
311-3	Shh-2	29.7682
311-3	Shh-2	29.6357
311-3	Shh-2	29.9495
311-4	Shh-2	29.5271	29.7489	0.198403
311-4	Shh-2	29.7379
311-4	Shh-2	29.7209
311-4	Shh-2	30.0096
311-7	Shh-2	33.3076	32.5209	0.873481
311-7	Shh-2	33.1673
311-7	Shh-2	31.4686
311-7	Shh-2	32.1403
311-8	Shh-2	30.735	30.4689	0.481513
311-8	Shh-2	29.7799
311-8	Shh-2	30.5064
311-8	Shh-2	30.8544
311-9	Shh-2	31.0186	30.9331	0.259443
311-9	Shh-2	30.7636
311-9	Shh-2	30.6903
311-9	Shh-2	31.2601
Sample Name	Detector Name	Ct	Six3-1	SD
311-1	Six3-1	29.1938	28.9271	0.232866
311-1	Six3-1	28.8987
311-1	Six3-1	28.9846
311-1	Six3-1	28.6314
311-10	Six3-1	27.7611	27.6425	0.108597
311-10	Six3-1	27.4985
311-10	Six3-1	27.6437
311-10	Six3-1	27.6666
311-2	Six3-1	28.0882	28.2751	0.192745
311-2	Six3-1	28.4764
311-2	Six3-1	28.4019
311-2	Six3-1	28.1339
311-3	Six3-1	27.8898	27.9731	0.0786649
311-3	Six3-1	28.0767
311-3	Six3-1	27.9445
311-3	Six3-1	27.9814
311-4	Six3-1	28.2254	28.2391	0.0969979
311-4	Six3-1	28.1129
311-4	Six3-1	28.3432
311-4	Six3-1	28.2749
311-7	Six3-1	28.9812	28.93	0.0878094
311-7	Six3-1	29.0243
311-7	Six3-1	28.8797
311-7	Six3-1	28.8347
311-8	Six3-1	27.7524	27.6822	0.176178
311-8	Six3-1	27.5845
311-8	Six3-1	27.8937
311-8	Six3-1	27.4981
311-9	Six3-1	27.7687	27.8182	0.0763091
311-9	Six3-1	27.8759
311-9	Six3-1	27.8903
311-9	Six3-1	27.7376
Sample Name	Detector Name	Ct	Six3-2	SD
311-1	Six3-2	29.1677	29.2535	0.168272
311-1	Six3-2	29.0771
311-1	Six3-2	29.4623
311-1	Six3-2	29.307
311-10	Six3-2	27.9388	28.0078	0.0930413
311-10	Six3-2	28.088
311-10	Six3-2	28.0879
311-10	Six3-2	27.9163
311-2	Six3-2	28.9072	28.8987	0.0470149
311-2	Six3-2	28.8634
311-2	Six3-2	28.8623
311-2	Six3-2	28.9618
311-3	Six3-2	28.1081	28.2274	0.12306
311-3	Six3-2	28.399
311-3	Six3-2	28.2153
311-3	Six3-2	28.1873
311-4	Six3-2	28.3661	28.5657	0.244597
311-4	Six3-2	28.744
311-4	Six3-2	28.3444
311-4	Six3-2	28.8084
311-7	Six3-2	29.3947	29.4426	0.185726
311-7	Six3-2	29.4152
311-7	Six3-2	29.2594
311-7	Six3-2	29.7012
311-8	Six3-2	27.9352	27.9722	0.0903596
311-8	Six3-2	28.1068
311-8	Six3-2	27.9129
311-8	Six3-2	27.9336
311-9	Six3-2	28.166	28.1201	0.0533958
311-9	Six3-2	28.0431
311-9	Six3-2	28.1396
311-9	Six3-2	28.1317
Sample Name	Detector Name	Ct	Six3-3	SD
311-1	Six3-3	30.332	30.3186	0.0655638
311-1	Six3-3	30.3319
311-1	Six3-3	30.2273
311-1	Six3-3	30.3834
311-10	Six3-3	29.2797	29.0885	0.208486
311-10	Six3-3	29.0159
311-10	Six3-3	28.8273
311-10	Six3-3	29.2311
311-2	Six3-3	29.935	29.8593	0.0716995
311-2	Six3-3	29.8898
311-2	Six3-3	29.7667
311-2	Six3-3	29.8456
311-3	Six3-3	29.2158	29.4428	0.17948
311-3	Six3-3	29.5074
311-3	Six3-3	29.4063
311-3	Six3-3	29.6418
311-4	Six3-3	29.6254	29.6833	0.160213
311-4	Six3-3	29.9127
311-4	Six3-3	29.5413
311-4	Six3-3	29.6537
311-7	Six3-3	30.8651	30.6214	0.276218
311-7	Six3-3	30.7427
311-7	Six3-3	30.2289
311-7	Six3-3	30.6488
311-8	Six3-3	29.0139	29.1228	0.103871
311-8	Six3-3	29.0681
311-8	Six3-3	29.2502
311-8	Six3-3	29.1589
311-9	Six3-3	29.156	29.0913	0.225553
311-9	Six3-3	29.3819
311-9	Six3-3	28.8923
311-9	Six3-3	28.9351
Sample Name	Detector Name	Ct	Ubc	SD
311-1	Ubc	20.9499	20.4366	0.199638
311-1	Ubc	20.667
311-1	Ubc	20.3152
311-1	Ubc	20.3276
311-10	Ubc	19.7905	19.8458	0.0614735
311-10	Ubc	19.9334
311-10	Ubc	19.8231
311-10	Ubc	19.8361
311-2	Ubc	20.1164	20.174	0.141784
311-2	Ubc	20.386
311-2	Ubc	20.1043
311-2	Ubc	20.0892
311-3	Ubc	19.9556	19.9499	0.0220705
311-3	Ubc	19.9658
311-3	Ubc	19.9608
311-3	Ubc	19.9174
311-4	Ubc	19.8881	19.8877	0.0340064
311-4	Ubc	19.849
311-4	Ubc	19.8821
311-4	Ubc	19.9318
311-7	Ubc	20.7054	20.7239	0.0976554
311-7	Ubc	20.7603
311-7	Ubc	20.5992
311-7	Ubc	20.8306
311-8	Ubc	20.0559	20.049	0.0205215
311-8	Ubc	20.0675
311-8	Ubc	20.053
311-8	Ubc	20.0197
311-9	Ubc	19.9217	19.9414	0.0133559
311-9	Ubc	19.9497
311-9	Ubc	19.9494
311-9	Ubc	19.9451
Sample Name	Detector Name	Ct	XIAP-1	SD
311-1	Xiap-1	28.6469	28.8013	0.118884
311-1	Xiap-1	28.7846
311-1	Xiap-1	28.844
311-1	Xiap-1	28.9296
311-10	Xiap-1	28.6607	28.621	0.164395
311-10	Xiap-1	28.3929
311-10	Xiap-1	28.6454
311-10	Xiap-1	28.7849
311-2	Xiap-1	28.5936	28.661	0.129314
311-2	Xiap-1	28.6082
311-2	Xiap-1	28.5877
311-2	Xiap-1	28.8545
311-3	Xiap-1	28.425	28.4681	0.133273
311-3	Xiap-1	28.3126
311-3	Xiap-1	28.5057
311-3	Xiap-1	28.6289
311-4	Xiap-1	28.4223	28.3413	0.0587614
311-4	Xiap-1	28.2816
311-4	Xiap-1	28.3315
311-4	Xiap-1	28.3297
311-7	Xiap-1	29.5691	29.5766	0.0748534
311-7	Xiap-1	29.6255
311-7	Xiap-1	29.638
311-7	Xiap-1	29.4737
311-8	Xiap-1	28.62	28.5173	0.0719846
311-8	Xiap-1	28.476
311-8	Xiap-1	28.5131
311-8	Xiap-1	28.46
311-9	Xiap-1	28.3719	28.4406	0.080761
311-9	Xiap-1	28.4872
311-9	Xiap-1	28.3728
311-9	Xiap-1	28.5304
Sample Name	Detector Name	Ct	XIAP-2	SD
311-1	Xiap-2	26.7015	26.6987	0.124659
311-1	Xiap-2	26.7498
311-1	Xiap-2	26.526
311-1	Xiap-2	26.8177
311-10	Xiap-2	26.3629	26.3001	0.133635
311-10	Xiap-2	26.4523
311-10	Xiap-2	26.1517
311-10	Xiap-2	26.2335
311-2	Xiap-2	26.3701	26.6347	0.191244
311-2	Xiap-2	26.6236
311-2	Xiap-2	26.7447
311-2	Xiap-2	26.8005
311-3	Xiap-2	26.1815	26.217	0.248624
311-3	Xiap-2	26.189
311-3	Xiap-2	25.9476
311-3	Xiap-2	26.5499
311-4	Xiap-2	25.6396	26.0152	0.316704
311-4	Xiap-2	26.1204
311-4	Xiap-2	26.3873
311-4	Xiap-2	25.9135
311-7	Xiap-2	26.3798	27.194	0.798835
311-7	Xiap-2	27.1315
311-7	Xiap-2	26.9755
311-7	Xiap-2	28.2894
311-8	Xiap-2	26.4226	26.4948	0.221368
311-8	Xiap-2	26.8218
311-8	Xiap-2	26.3325
311-8	Xiap-2	26.4024
311-9	Xiap-2	26.3528	26.3136	0.0754429
311-9	Xiap-2	26.2021
311-9	Xiap-2	26.3654
311-9	Xiap-2	26.3342

## Sheet: E8_5 processed qPCR 
Genotype		actin	Ubc	Hprt	Gli1	Ptch1	Shh-1	Shh-2	Six3-1	Six3-2	Six3-3	XIAP-1	XIAP-2
Tctn2+/+	311-1	20.8327	20.4366	26.567	30.5713	27.7423	31.3039	30.3757	28.9271	29.2535	30.3186	28.8013	26.6987
Tctn2+/+	311-2	20.6736	20.174	26.5702	30.5258	27.6672	31.2941	30.4094	28.2751	28.8987	29.8593	28.661	26.6347
Tctn2+/+	311-3	19.9629	19.9499	26.1994	29.5594	27.1874	30.8529	29.8238	27.9731	28.2274	29.4428	28.4681	26.217
Tctn2+/+	311-4	19.9312	19.8877	26.2692	30.0245	27.2374	30.6485	29.7489	28.2391	28.5657	29.6833	28.3413	26.0152
Tctn2-/-	311-7	21.8089	20.7239	26.8957	32.0128	28.9231	33.6121	32.5209	28.93	29.4426	30.6214	29.5766	27.194
Tctn2-/-	311-8	20.0429	20.049	26.7766	30.5605	27.6933	31.4587	30.4689	27.6822	27.9722	29.1228	28.5173	26.4948
Tctn2-/-	311-9	20.1514	19.9414	26.2686	30.5818	27.7018	31.5842	30.9331	27.8182	28.1201	29.0913	28.4406	26.3136
Tctn2-/-	311-10	19.9968	19.8458	25.9655	30.5708	27.7638	31.3058	30.5647	27.6425	28.0078	29.0885	28.621	26.3001
		Gli1
		average CT values of your technical replicates										delta delta CT
		endogenous controls					target gene		delta CT				Gli1
		actin	Ubc	Hprt		geomean	Gli1		c1	8.12391		c1	0.958407		k1	0.515084
Tctn2+/+	311-1	20.8327	20.4366	26.567		22.4474	30.5713		c2	8.2311		c2	0.889778		k2	0.746867
Tctn2+/+	311-2	20.6736	20.174	26.5702		22.2947	30.5258		c3	7.70771		c3	1.27891		k3	0.66771
Tctn2+/+	311-3	19.9629	19.9499	26.1994		21.8517	29.5594		c4	8.18776		c4	0.916914		k4	0.595674
Tctn2+/+	311-4	19.9312	19.8877	26.2692		21.8368	30.0245		mean	8.06262		average	1.011		average	0.631334
Tctn2-/-	311-7	21.8089	20.7239	26.8957		22.993	32.0128		k1	9.01974		set to 1	1
Tctn2-/-	311-8	20.0429	20.049	26.7766		22.0768	30.5605		k2	8.4837		STD	0.180821		STD	0.0990905
Tctn2-/-	311-9	20.1514	19.9414	26.2686		21.9364	30.5818		k3	8.64533		SE	0.0904105		SE	0.0495453
Tctn2-/-	311-10	19.9968	19.8458	25.9655		21.7608	30.5708		k4	8.81003					FC	0.624463
						average CT	30.5509								t-test	0.010298
		Ptch1
		average CT values of your technical replicates										delta delta CT
		endogenous controls					target gene		delta CT				Ptch1
		actin	Ubc	Hprt		geomean	Ptch1		c1	5.29496		c1	1.03959		k1	0.669363
Tctn2+/+	311-1	20.8327	20.4366	26.567		22.4474	27.7423		c2	5.37259		c2	0.985123		k2	0.831905
Tctn2+/+	311-2	20.6736	20.174	26.5702		22.2947	27.6672		c3	5.33568		c3	1.01066		k3	0.750335
Tctn2+/+	311-3	19.9629	19.9499	26.1994		21.8517	27.1874		c4	5.40064		c4	0.966153		k4	0.636381
Tctn2+/+	311-4	19.9312	19.8877	26.2692		21.8368	27.2374		mean	5.35097		average	1.00038		average	0.721996
Tctn2-/-	311-7	21.8089	20.7239	26.8957		22.993	28.9231		k1	5.93011		set to 1	1
Tctn2-/-	311-8	20.0429	20.049	26.7766		22.0768	27.6933		k2	5.61648		STD	0.0318697		STD	0.0875276
Tctn2-/-	311-9	20.1514	19.9414	26.2686		21.9364	27.7018		k3	5.76536		SE	0.0159348		SE	0.0437638
Tctn2-/-	311-10	19.9968	19.8458	25.9655		21.7608	27.7638		k4	6.00301					FC	0.721722
						average CT	27.7395								t-test	0.000984026
		Shh-1
		average CT values of your technical replicates										delta delta CT
		endogenous controls					target gene		delta CT				Shh-1
		actin	Ubc	Hprt		geomean	Shh-1		c1	8.85653		c1	1.04299		k1	0.307388
	311-1	20.8327	20.4366	26.567		22.4474	31.3039		c2	8.99948		c2	0.944597		k2	0.724651
	311-2	20.6736	20.174	26.5702		22.2947	31.2941		c3	9.00123		c3	0.943455		k3	0.60269
	311-3	19.9629	19.9499	26.1994		21.8517	30.8529		c4	8.81177		c4	1.07585		k4	0.64719
	311-4	19.9312	19.8877	26.2692		21.8368	30.6485		mean	8.91725		average	1.00172		average	0.57048
	311-7	21.8089	20.7239	26.8957		22.993	33.6121		k1	10.6191		set to 1	1
	311-8	20.0429	20.049	26.7766		22.0768	31.4587		k2	9.3819		STD	0.0679624		STD	0.18249
	311-9	20.1514	19.9414	26.2686		21.9364	31.5842		k3	9.64777		SE	0.0339812		SE	0.0912451
	311-10	19.9968	19.8458	25.9655		21.7608	31.3058		k4	9.54499					FC	0.569499
						average CT	31.5075								t-test	0.00442769
		Shh-2
		average CT values of your technical replicates										delta delta CT
		endogenous controls					target gene		delta CT				Shh-2
		actin	Ubc	Hprt		geomean	Shh-2		c1	7.92828		c1	1.03782		k1	0.342432
Tctn2+/+	311-1	20.8327	20.4366	26.567		22.4474	30.3757		c2	8.11479		c2	0.911958		k2	0.752466
Tctn2+/+	311-2	20.6736	20.174	26.5702		22.2947	30.4094		c3	7.97212		c3	1.00676		k3	0.494872
Tctn2+/+	311-3	19.9629	19.9499	26.1994		21.8517	29.8238		c4	7.91214		c4	1.04949		k4	0.565636
Tctn2+/+	311-4	19.9312	19.8877	26.2692		21.8368	29.7489		mean	7.98183		average	1.00151		average	0.538852
Tctn2-/-	311-7	21.8089	20.7239	26.8957		22.993	32.5209		k1	9.52794		set to 1	1
Tctn2-/-	311-8	20.0429	20.049	26.7766		22.0768	30.4689		k2	8.39213		STD	0.0623639		STD	0.17016
Tctn2-/-	311-9	20.1514	19.9414	26.2686		21.9364	30.9331		k3	8.9967		SE	0.031182		SE	0.0850801
Tctn2-/-	311-10	19.9968	19.8458	25.9655		21.7608	30.5647		k4	8.80388					FC	0.538041
						average CT	30.6057								t-test	0.00220887
		Six3-1
		average CT values of your technical replicates										delta delta CT
		endogenous controls					target gene		delta CT				Six3-1
		actin	Ubc	Hprt		geomean	Six3-1		c1	6.47973		c1	0.850419		k1	1.23886
Tctn2+/+	311-1	20.8327	20.4366	26.567		22.4474	28.9271		c2	5.98046		c2	1.20207		k2	1.55899
Tctn2+/+	311-2	20.6736	20.174	26.5702		22.2947	28.2751		c3	6.12139		c3	1.09019		k3	1.28723
Tctn2+/+	311-3	19.9629	19.9499	26.1994		21.8517	27.9731		c4	6.40233		c4	0.89729		k4	1.28727
Tctn2+/+	311-4	19.9312	19.8877	26.2692		21.8368	28.2391		mean	6.24598		average	1.00999		average	1.34309
Tctn2-/-	311-7	21.8089	20.7239	26.8957		22.993	28.93		k1	5.93697		set to 1	1
Tctn2-/-	311-8	20.0429	20.049	26.7766		22.0768	27.6822		k2	5.60537		STD	0.164816		STD	0.145733
Tctn2-/-	311-9	20.1514	19.9414	26.2686		21.9364	27.8182		k3	5.88171		SE	0.0824078		SE	0.0728665
Tctn2-/-	311-10	19.9968	19.8458	25.9655		21.7608	27.6425		k4	5.88167					FC	1.3298
						average CT	28.1859								t-test	0.0231562
		Six3-2
		average CT values of your technical replicates										delta delta CT
		endogenous controls					target gene		delta CT				Six3-2
		actin	Ubc	Hprt		geomean	Six3-2		c1	6.80614		c1	0.884284		k1	1.13217
	311-1	20.8327	20.4366	26.567		22.4474	29.2535		c2	6.60402		c2	1.01727		k2	1.66252
	311-2	20.6736	20.174	26.5702		22.2947	28.8987		c3	6.37574		c3	1.19166		k3	1.36137
	311-3	19.9629	19.9499	26.1994		21.8517	28.2274		c4	6.72898		c4	0.932866		k4	1.30293
	311-4	19.9312	19.8877	26.2692		21.8368	28.5657		mean	6.62872		average	1.00652		average	1.36475
	311-7	21.8089	20.7239	26.8957		22.993	29.4426		k1	6.44963		set to 1	1
	311-8	20.0429	20.049	26.7766		22.0768	27.9722		k2	5.89535		STD	0.135104		STD	0.221055
	311-9	20.1514	19.9414	26.2686		21.9364	28.1201		k3	6.18366		SE	0.0675521		SE	0.110528
	311-10	19.9968	19.8458	25.9655		21.7608	28.0078		k4	6.24696					FC	1.35591
						average CT	28.561								t-test	0.0326182
		Six3-3
		average CT values of your technical replicates										delta delta CT
		endogenous controls					target gene		delta CT				Six3-3
		actin	Ubc	Hprt		geomean	Six3-3	geomean	c1	7.87126	7.87126	c1	0.899455	0.899455	k1	1.06439
Tctn2+/+	311-1	20.8327	20.4366	26.567		22.4474	30.3186	30.3186	c2	7.56462	7.56462	c2	1.11247	1.11247	k2	1.59374
Tctn2+/+	311-2	20.6736	20.174	26.5702		22.2947	29.8593	29.8593	c3	7.59114	7.59114	c3	1.0922	1.0922	k3	1.47786
Tctn2+/+	311-3	19.9629	19.9499	26.1994		21.8517	29.4428	29.4428	c4	7.84652	7.84652	c4	0.915015	0.915015	k4	1.31102
Tctn2+/+	311-4	19.9312	19.8877	26.2692		21.8368	29.6833	29.6833	mean	7.71838	7.71838	average	1.00479	1.00479	average	1.36175
Tctn2-/-	311-7	21.8089	20.7239	26.8957		22.993	30.6214	30.6214	k1	7.62836	7.62836	set to 1	1	2
Tctn2-/-	311-8	20.0429	20.049	26.7766		22.0768	29.1228	29.1228	k2	7.04596	7.04596	STD	0.113125	0.113125	STD	0.22971
Tctn2-/-	311-9	20.1514	19.9414	26.2686		21.9364	29.0913	29.0913	k3	7.15488	7.15488	SE	0.0565623	0.0565623	SE	0.114855
Tctn2-/-	311-10	19.9968	19.8458	25.9655		21.7608	29.0885	29.0885	k4	7.3277	7.3277				FC	1.35526
						average CT	29.6535								t-test	0.031653
		XIAP-1
		average CT values of your technical replicates										delta delta CT
		endogenous controls					target gene		delta CT				XIAP-1
		actin	Ubc	Hprt		geomean	XIAP-1		c1	6.35392		c1	1.07651		k1	0.9181
Tctn2+/+	311-1	20.8327	20.4366	26.567		22.4474	28.8013		c2	6.36635		c2	1.06728		k2	1.01383
Tctn2+/+	311-2	20.6736	20.174	26.5702		22.2947	28.661		c3	6.61636		c3	0.897463		k3	0.970064
Tctn2+/+	311-3	19.9629	19.9499	26.1994		21.8517	28.4681		c4	6.50452		c4	0.969806		k4	0.757919
Tctn2+/+	311-4	19.9312	19.8877	26.2692		21.8368	28.3413		mean	6.46029		average	1.00277		average	0.914977
Tctn2-/-	311-7	21.8089	20.7239	26.8957		22.993	29.5766		k1	6.58356		set to 1	1
Tctn2-/-	311-8	20.0429	20.049	26.7766		22.0768	28.5173		k2	6.44048		STD	0.0851983		STD	0.111778
Tctn2-/-	311-9	20.1514	19.9414	26.2686		21.9364	28.4406		k3	6.50414		SE	0.0425991		SE	0.0558888
Tctn2-/-	311-10	19.9968	19.8458	25.9655		21.7608	28.621		k4	6.86017					FC	0.912453
						average CT	28.6784								t-test	0.258096
		XIAP-2
		average CT values of your technical replicates										delta delta CT
		endogenous controls					target gene		delta CT				XIAP-2
		actin	Ubc	Hprt		geomean	XIAP-2		c1	4.25135		c1	1.02274		k1	1.05905
Tctn2+/+	311-1	20.8327	20.4366	26.567		22.4474	26.6987		c2	4.34008		c2	0.961738		k2	0.911153
Tctn2+/+	311-2	20.6736	20.174	26.5702		22.2947	26.6347		c3	4.3653		c3	0.94507		k3	0.937316
Tctn2+/+	311-3	19.9629	19.9499	26.1994		21.8517	26.217		c4	4.17845		c4	1.07575		k4	0.837694
Tctn2+/+	311-4	19.9312	19.8877	26.2692		21.8368	26.0152		mean	4.2838		average	1.00133		average	0.936303
Tctn2-/-	311-7	21.8089	20.7239	26.8957		22.993	27.194		k1	4.20103		set to 1	1
Tctn2-/-	311-8	20.0429	20.049	26.7766		22.0768	26.4948		k2	4.41803		STD	0.0598057		STD	0.0920581
Tctn2-/-	311-9	20.1514	19.9414	26.2686		21.9364	26.3136		k3	4.37719		SE	0.0299028		SE	0.0460291
Tctn2-/-	311-10	19.9968	19.8458	25.9655		21.7608	26.3001		k4	4.5393					FC	0.935063
						average CT	26.4835								t-test	0.280964

## Sheet: E9_5 processed qPCR
Embryo	genotype	actin	SD	Ubc	SD	Gli1	SD	Ptch1	SD	Shh-1	SD	Shh-2	SD
2	tctn2+/+ (c1)	15.8256	0.138905	19.915	0.065477	24.1504	0.352054	21.8004	0.300206	25.5379	0.417032	24.9076	0.453665
6	tctn2+/+ (c2)	16.1899	0.176584	20.2132	0.165536	24.0082	0.358085	21.8652	0.2993	26.0415	0.330076	24.985	0.371552
7	tctn2+/+ (c3)	16.3985	0.178914	20.3572	0.309684	24.1476	0.447057	22.2324	0.426657	26.3983	0.483142	25.537	0.44353
1	tctn2-/- (k1)	15.9897	0.2167	19.9926	0.160858	24.785	0.501019	22.5154	0.308417	27.1564	0.308013	26.3802	0.61582
3	tctn2-/- (k2)	16.1447	0.248262	19.9818	0.0513209	25.112	0.424253	22.4454	0.310297	27.2416	0.619177	26.5264	0.204204
4	tctn2-/- (k3)	16.122	0.210971	20.289	0.289993	24.708	0.472453	22.4791	0.274303	26.7012	0.327722	26.4097	0.690656
5	tctn2-/- (k4)	16.2286	0.229695	19.828	0.064465	24.6456	0.263408	22.4385	0.293927	27.3214	0.170676	26.3713	0.482813
	Gli1
	average CT values of your technical replicates										delta delta CT
	endogenous controls					target gene		delta CT				Gli1
	actin	Ubc	Pde12	Sra1	geomean	Gli1		c1	6.39752		c1	0.793662	0.78351	k1	0.55808	0.550942
c1	15.8256	19.915			17.7529	24.1504		c2	5.91814		c2	1.10648	1.09233	k2	0.470789	0.464767
c2	16.1899	20.2132			18.0901	24.0082		c3	5.87669		c3	1.13873	1.12416	k3	0.679255	0.670567
c3	16.3985	20.3572			18.271	24.1476		mean	6.06412					k4	0.640277	0.632087
k1	15.9897	19.9926			17.8795	24.785		k1	6.90557		average	1.01296	1.00979	average	0.587101
k2	16.1447	19.9818			17.9611	25.112		k2	7.15096		set to 1	1
k3	16.122	20.289			18.0859	24.708		k3	6.62209		STD	0.190598		STD	0.0925397
k4	16.2286	19.828			17.9382	24.6456		k4	6.70735		SE	0.0952992		SE	0.0462699
					#NUM!									FC	0.579591
					average CT	24.5081								t-test	0.0105762
	ptch1
	average CT values of your technical replicates										delta delta CT
	endogenous controls					target gene		delta CT				ptch1
	actin	Ubc	Pde12	Sra1	geomean	ptch1		c1	4.04747		c1	0.92053	0.917649	k1	0.680026	0.677898
c1	15.8256	19.915	0	0	17.7529	21.8004		c2	3.77515		c2	1.11177	1.10829	k2	0.724396	0.722129
c2	16.1899	20.2132	0	0	18.0901	21.8652		c3	3.9614		c3	0.97712	0.974062	k3	0.67257	0.670465
c3	16.3985	20.3572	0	0	18.271	22.2324		mean	3.92801					k4	0.67257	0.670465
k1	15.9897	19.9926	0	0	17.8795	22.5154		k1	4.63596		average	1.00314	1	average	0.687391
k2	16.1447	19.9818	0	0	17.9611	22.4454		k2	4.48435		set to 1	1
k3	16.122	20.289	0	0	18.0859	22.4791		k3	4.39316		STD	0.0982379		STD	0.0249192
k4	16.2286	19.828	0	0	17.9382	22.4385		k4	4.50025		SE	0.0491189		SE	0.0124596
														FC	0.685239
					average CT	22.2538								t-test	0.001426
	Shh-1
	average CT values of your technical replicates										delta delta CT
	endogenous controls					target gene		delta CT				Shh-1
	actin	Ubc	Pde12	Sra1	geomean	Shh-1		c1	7.78503		c1	1.12475	1.11949	k1	0.399907	0.398038
c1	15.8256	19.915	0	0	17.7529	25.5379		c2	7.95147		c2	1.00219	0.99751	k2	0.39889	0.397026
c2	16.1899	20.2132	0	0	18.0901	26.0415		c3	8.12739		c3	0.887144	0.882998	k3	0.632565	0.629609
c3	16.3985	20.3572	0	0	18.271	26.3983		mean	7.95463					k4	0.371511	0.369775
k1	15.9897	19.9926	0	0	17.8795	27.1564		mean	7.95463		average	1.00469	1	average	0.450718
k2	16.1447	19.9818	0	0	17.9611	27.2416		k1	9.27689		set to 1	1
k3	16.122	20.289	0	0	18.0859	26.7012		k2	9.28056		STD	0.118822		STD	0.121942
k4	16.2286	19.828	0	0	17.9382	27.3214		k3	8.61534		SE	0.0594108		SE	0.0609712
								k4	9.38315					FC	0.448612
					average CT	26.6283								t-test	0.00183361
	Shh-2
	average CT values of your technical replicates										delta delta CT
	endogenous controls					target gene		delta CT				Shh-2
	actin	Ubc	Pde12	Sra1	geomean	Shh-2		c1	7.1547		c1	0.966306	0.96063	k1	0.380131	0.377898
c1	15.8256	19.915	0	0	17.7529	24.9076		c2	6.89498		c2	1.15691	1.15011	k2	0.363482	0.361347
c2	16.1899	20.2132	0	0	18.0901	24.985		c3	7.26608		c3	0.894511	0.889257	k3	0.429724	0.4272
c3	16.3985	20.3572	0	0	18.271	25.537								k4	0.398367	0.396027
k1	15.9897	19.9926	0	0	17.8795	26.3802		mean	7.10526		average	1.00591	1	average	0.392926
k2	16.1447	19.9818	0	0	17.9611	26.5264		k1	8.50069		set to 1	1
k3	16.122	20.289	0	0	18.0859	26.4097		k2	8.5653		STD	0.135608		STD	0.0283686
k4	16.2286	19.828	0	0	17.9382	26.3713		k3	8.32377		SE	0.0678039		SE	0.0141843
								k4	8.43309					FC	0.390618
					average CT	25.8739								t-test	0.000273173
c1
c2
c3
c4
k1
k2
k3
k4
c1
c2
c3
c4
k1
k2
k3
k4
c1
c2
c3
c4
k1
k2
k3
k4
c1
c2
c3
c4
k1
k2
k3
k4
c1
c2
c3
c4
k1
k2
k3
k4
c1
c2
c3
c4
k1
k2
k3
k4
c1
c2
c3
c4
k1
k2
k3
k4
c1
c2
c3
c4
k1
k2
k3
k4
																1
c1																1
c2																1
c3																1
c4																1
k1
k2																0
k3																0
k4																#DIV/0!
																#DIV/0!
																#DIV/0!
c1																#DIV/0!
c2																#DIV/0!
c3																#DIV/0!
c4																#DIV/0!
k1
k2																#DIV/0!
k3																#DIV/0!
k4																#DIV/0!
																#DIV/0!
c1
c2
c3
c4
k1
k2
k3
k4
c1
c2
c3
c4
k1
k2
k3
k4
