# Supplementary material for: Ciliary Hedgehog signaling regulates cell survival to build the facial midline
Source: eLife journal article supplement (doi:10.7554/elife.68558), 2021-10-21
Supplement: supp [file elife_poa_e68558_Figure_4_figure_supplement_1_source_data_1.xlsx]

## Sheet: Wnt1-cre
E11_5 Neural crest (Wnt1-cre) Tctn2 deletion Midface quantification
Control (-cre)	Wnt1-cre; Tctn2c/-
1.068	1.006
1.047	0.943
0.88	1.338
0.983
0.99
1.066
0.952

## Sheet: Isl1-cre
E11_5 Prechordal plate (Isl1-cre) Tctn2 deletion Midface quantification
control (-cre)	Isl1-cre; Tctn2c/-
0.981	1.145
1.04	1.08
1.02	0.92
1.14	0.949
1.03	1.012
0.988
1.067
1.012

## Sheet: Sox1-cre
E11_5 neurectoderm (Sox1-cre) Tctn2 deletion Midface quantification
control (-cre)	Sox1-cre; Tctn2c/-
1.01	0.943
1.11	1.144
1.015	0.987
1.001	0.949
0.994	1.086
	1.02
	0.96

## Sheet: Crect-cre
E11_5 facial ectoderm (Crect-cre) Tctn2 deletion Midface quantification
control (-cre)	Crect-cre; Tctn2c/-
1.082	1.052
0.898	1.031
1	1.005
0.986	1.021
0.948
1.048

## Sheet: Foxg1-cre
E11_5 Forebrain (Foxg1-cre) Tctn2 deletion Midface quantification
control (-cre)	Foxg1-cre; Tctn2c/-
0.908	1.153
1	0.986
1.109
1.135
