# Supplementary material for: Ciliary Hedgehog signaling regulates cell survival to build the facial midline
Source: eLife journal article supplement (doi:10.7554/elife.68558), 2021-10-21
Supplement: supp [file elife_poa_e68558_Figure_4_source_data_1.xlsx]

## Sheet: Figure 4 pHH3
E9_5 pHH3 Quantification
	FB nuclei	FB pHH3	% FB pHH3	HB nuclei	HB pHH3	% HB pHH3	Ecad nuclei	Ecad pHH3	%Ecad pHH3	Mesen nuclei	mesen pHH3	% mesen pHH3
tctn2 control 1-1	664	41	6.1747	476	26	5.46218	209	14	6.69856	1196	39	3.26087
tctn2 null 1-1	699	43	6.15165	460	28	6.08696	205	15	7.31707	1116	32	2.86738
tctn2 control 1-2	662	47	7.0997	383	22	5.74413	389	16	4.11311	1267	46	3.63062
tctn2 null 1-2	568	40	7.04225	396	29	7.32323	241	15	6.22407	1149	27	2.34987
tctn2 control 1-3	664	41	6.1747	342	15	4.38596	236	19	8.05085	1371	37	2.69876
tctn2 null 1-3	519	36	6.93642	329	13	3.95137	235	13	5.53191	1211	36	2.97275
tctn2 control 2-1	653	26	3.98162	404	20	4.9505	368	24	6.52174	1264	40	3.16456
tctn2 null 2-1	567	35	6.17284	397	11	2.77078	351	16	4.5584	1081	22	2.03515
tctn2 control 2-2	210	11	5.2381	508	12	2.3622	444	30	6.75676	1176	29	2.46599
tctn2 null 2-2	287	6	2.09059	393	21	5.34351	391	24	6.13811	1185	29	2.44726
tctn2 control 2-3				329	17	5.16717	369	19	5.14905	977	25	2.55885
tctn2 null 2-3				473	25	5.28541	370	16	4.32432	900	28	3.11111
tctn2 control 3-1	483	31	6.41822	467	24	5.13919	225	8	3.55556	808	18	2.22772
tctn2 null 3-1	525	29	5.52381	573	26	4.53752	191	8	4.18848	703	18	2.56046
tctn2 control 3-2	567	20	3.52734	301	22	7.30897	210	13	6.19048	925	20	2.16216
tctn2 null 3-2	636	31	4.87421	499	29	5.81162	190	8	4.21053	798	28	3.50877
tctn2 control 3-3	563	43	7.63766	359	21	5.84958	209	11	5.26316	977	28	2.86592
tctn2 null 3-3	772	65	8.41969	489	30	6.13497	200	9	4.5	866	27	3.11778
		Avg Tctn2 het	5.7815		Avg Tctn2 het	5.15221		Avg Tctn2 het	5.81103		Avg Tctn2 het	2.78172
		Avg Tctn2 null	5.90143		Avg Tctn2 null	5.24949		Avg Tctn2 null	5.22143		Avg Tctn2 null	2.7745

## Sheet: Figure 4 TUNEL
E9_5 TUNEL Quantification
	FB nuclei	FB Tunel	% FB Tunel	HB nuclei	HB tunel	% HB Tunel	surf ect nuclei	surf ect tunel	% ecto Tunel	mesenchyme nuclei	mesenchyme tunel	% mesenchyme Tunel
tctn2 control 1-1	599	8	1.33556	341	50	14.6628	218	8	3.66972	1258	16	1.27186
tctn2 null 1-1	590	92	15.5932	417	142	34.0528	213	44	20.6573	1159	17	1.46678
tctn2 control 1-2	690	12	1.73913	318	57	17.9245	258	15	5.81395	1267	21	1.65746
tctn2 null 1-2	576	153	26.5625	447	194	43.4004	227	57	25.1101	1167	53	4.54156
tctn2 control 2-1	672	34	5.05952	361	75	20.7756	218	25	11.4679	1405	25	1.77936
tctn2 null 2-1	624	218	34.9359	347	100	28.8184	220	74	33.6364	1171	53	4.52605
tctn2 control 2-2	742	29	3.90836	349	50	14.3266	239	15	6.27615	1422	16	1.12518
tctn2 null 2-2	585	295	50.4274	430	91	21.1628	242	66	27.2727	1199	36	3.0025
tctn2 control 3-1	546	47	8.60806	449	89	19.8218	367	42	11.4441	1234	42	3.40357
tctn2 null 3-1	587	410	69.8467	403	122	30.273	308	95	30.8442	1137	56	4.92524
tctn2 control 3-2	300	4	1.33333	489	25	5.11247	436	8	1.83486	1243	6	0.482703
tctn2 null 3-2	565	367	64.9558	423	146	34.5154	358	141	39.3855	1182	90	7.61421
			FB TUNEL			HB TUNEL			ecto TUNEL			mesenchyme TUNEL
		Avg Tctn2 het	3.66399		Avg Tctn2 het	15.4373		Avg Tctn2 het	6.75112		Avg Tctn2 het	1.62002
		Avg Tctn2 Null	43.7202		Avg Tctn2 Null	32.0371		Avg Tctn2 Null	29.4844		Avg Tctn2 Null	4.34606
