# Supplementary material for: Ciliary Hedgehog signaling regulates cell survival to build the facial midline
Source: eLife journal article supplement (doi:10.7554/elife.68558), 2021-10-21
Supplement: supp [file elife_poa_e68558_Figure_5_source_data_1.xlsx]

## Sheet: E9_5 Tctn2 Ptch1 rescue TUNEL
Genotype	FB nuclei	FB Tunel	% FB Tunel	FB Avg	HB nuclei	HB tunel	% HB Tunel	HB Avg	surf ect nuclei	surf ect tunel	% ecto Tunel	Ecto avg	mesenchyme nuclei	mesenchyme tunel	% mesenchyme Tunel	Mesenchyme Avg
Tctn2+/+ 1	609	3	0.492611	1.72318	497	10	2.01207	8.80973	249	7	2.81124	5.46852	1477	7	0.473934	1.6317
Tctn2+/+ 1	657	8	1.21766		554	35	6.31769		379	16	4.22164		1309	19	1.45149
Tctn2+/+ 2	683	23	3.3675		543	39	7.18232		359	17	4.73538		1437	46	3.20111
Tctn2+/+ 2	857	8	0.933489		495	45	9.09091		423	23	5.43735		1528	24	1.57068
Tctn2+/+ 3	887	19	2.14205		428	81	18.9252		478	34	7.11297		1542	25	1.62127
Tctn2+/+ 3	732	16	2.18579		418	39	9.33014		471	40	8.49257		1291	19	1.47173
Tctn2-/- 1	753	34	4.51527	23.8837	505	183	36.2376	25.2535	319	57	17.8683	18.8305	1419	58	4.08739	4.25558
Tctn2-/- 1	738	36	4.87805		625	127	20.32		372	57	15.3226		1577	43	2.7267
Tctn2-/- 2	747	159	21.2851		703	252	35.8464		402	84	20.8955		1572	73	4.64377
Tctn2-/- 2	727	239	32.8748		666	162	24.3243		420	93	22.1429		1607	84	5.22713
Tctn2-/- 3	801	428	53.4332		610	112	18.3607		436	79	18.1193		1613	98	6.07564
Tctn2-/- 3	950	250	26.3158		426	70	16.4319		542	101	18.6347		1695	47	2.77286
Tctn2-/-;Ptch1+/- 1	515	12	2.3301	2.06672	385	5	1.2987	7.6897	502	2	0.398406	5.27758	1340	6	0.447761	0.681185
Tctn2-/-;Ptch1+/- 1	464	9	1.93966		457	50	10.9409		285	22	7.7193		1029	10	0.971817
Tctn2-/-;Ptch1+/- 2	532	6	1.12782		482	19	3.94191		354	14	3.9548		1440	2	0.138889
Tctn2-/-;Ptch1+/- 2	519	15	2.89017		450	49	10.8889		361	19	5.26316		1446	10	0.691563
Tctn2-/-;Ptch1+/- 3	497	12	2.41449		384	46	11.9792		382	33	8.63874		1348	17	1.26113
Tctn2-/-;Ptch1+/- 3	530	9	1.69811		395	28	7.08861		492	28	5.69106		1389	8	0.575954

## Sheet: E11_5 Midface Measurements
Tctn2 Ptch1 rescue E11_5
	Tctn2 +/- midface norm	Tctn2-/- midface norm	Tctn2-/-; Ptch1+/- midface norm
	1.04651	0.430447	1.28114
	0.962137	0.472635	1.34149
	1.00422	0.441164	1.23076
	0.945151	0.522095	0.984611
	1.24261	0.78327
	1.02214	0.501267
	0.911737	0.422687
	1.07034	0.777567
	1.03676	0.376919
	0.923954
	1.00824
	0.97928
	1.02072
Cc2d2a Ptch1 rescue E11_5
	Cc2d2a+/- midface norm	Cc2d2a-/- midface norm	Tctn2-/-; Ptch1+/- midface norm
	0.938377	0.406956	1.20128
	1.05796	0.748627	1.27157
	0.970714	0.325198	1.27473
	1.06284	0.661379
	1.08481	0.634533
	0.995714	0.387841
	1.07575	0.424354
	1.0097	0.364218
	0.97309
	0.996806
	1.00319
