# Supplementary figures and images for: Ciliary Hedgehog signaling regulates cell survival to build the facial midline
Source: eLife journal article supplement (doi:10.7554/elife.68558), 2021-10-21

Figure 1 - Figure Supplement 2. Removing TCTN2 in the neural crest does not result in hypotelorism

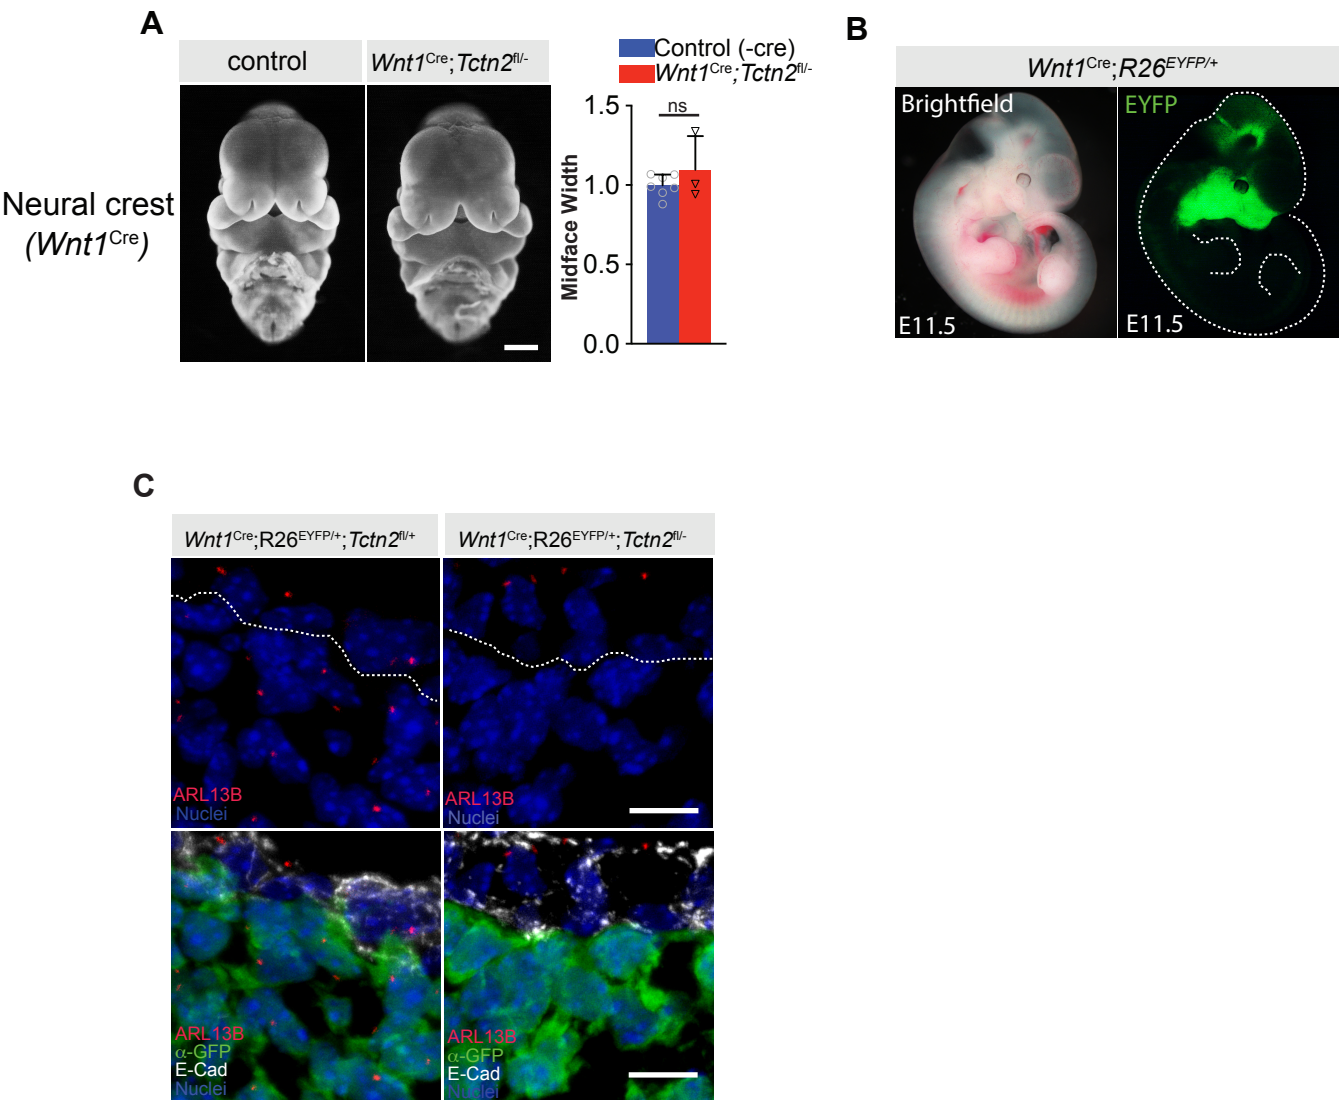

Supplement: supp [file elife-68558-supp-v1.zip]
